# Supplementary material
Source: PubMed Central journal article supplement (PMC7428835)
Supplement: NIHMS1538204-supplement-1.pdf [file NIHMS1538204-supplement-1.pdf]

**Supplementary table 1 : Characteristics of psoriasis patients who improved their skin disease severity at 1-year.**

| Variable                                        | Baseline<br>(N=78) | 1-year<br>(N=78) | p-value          |
|-------------------------------------------------|--------------------|------------------|------------------|
| <b>Demographic and Clinical Characteristics</b> |                    |                  |                  |
| Age, years                                      | 50.3 ± 12.7        | 51.5 ± 12.7      | <b>&lt;0.001</b> |
| Males                                           | 50 (62)            | 50 (62)          | 1.00             |
| Caucasian                                       | 64 (79)            | 64 (79)          | 1.00             |
| Hypertension                                    | 22 (27)            | 22 (27)          | 1.00             |
| Hyperlipidemia                                  | 35 (43)            | 40 (53)          | 0.06             |
| Type-2 Diabetes                                 | 7 (9)              | 7 (9)            | 1.00             |
| Body Mass Index(BMI)                            | 29.6 ± 6.5         | 29.4 ± 6.4       | 0.15             |
| Waist-to-hip Ratio(WHR)                         | 0.97 (0.91-1.02)   | 0.98 (0.92-1.01) | 0.66             |
| Current Smoker                                  | 9 (11)             | 4 (5)            | <b>0.03</b>      |
| Statin Use                                      | 24 (30)            | 24 (30)          | 1.00             |
| <b>Clinical and Lab Values</b>                  |                    |                  |                  |
| Total Cholesterol, mg/dl                        | 183.2 ± 35.9       | 180.1 ± 34.5     | 0.19             |
| HDL Cholesterol, mg/dl                          | 54.8 ± 16.0        | 55.1 ± 16.0      | 0.37             |
| LDL Cholesterol, mg/dl                          | 104.3 ± 28.2       | 99.7 ± 30.3      | 0.07             |
| Triglycerides, mg/dl                            | 124.5 ± 79.2       | 128.1 ± 64.9     | 0.32             |
| Framingham Risk Score                           | 2 (1-6)            | 2 (1-5)          | 0.88             |

Values reported in the table as Mean ± SD or Median (IQR) for continuous data and N (%) for categorical data. P-value less than 0.05 was deemed significant.
